# Supplementary material for: Polymeric nano-vesicles via intermolecular action to load and orally deliver insulin with enhanced hypoglycemic effect
Source: Royal Society of Chemistry journal article supplement (doi:10.1039/d0ra00382d), 2020-01-01
Supplement: d0ra00382d1.pdf [file d0ra00382d1.pdf]

**Supplementary Materials:**

**Polymeric nano-vesicles via intermolecular action to load and orally deliver insulin with enhanced hypoglycemic effect**

Yumiao Hu<sup>#</sup>, Juan Wang<sup>#</sup>, Liyan Qiu<sup>\*</sup>

Supplementary Fig. 1 Characterization of OPA by <sup>1</sup>H-NMR spectroscopy.

Supplementary Fig. 2 GPC spectrum of PEOP.

Supplementary Fig. 3 <sup>1</sup>H-NMR spectrum of Insulin.

Supplementary Fig. 4 Size distribution of (A) blank PEOP vesicles, (B) insulin-PEOP vesicles.

Supplementary Table 1 The changes of TEER of model cell monolayers.

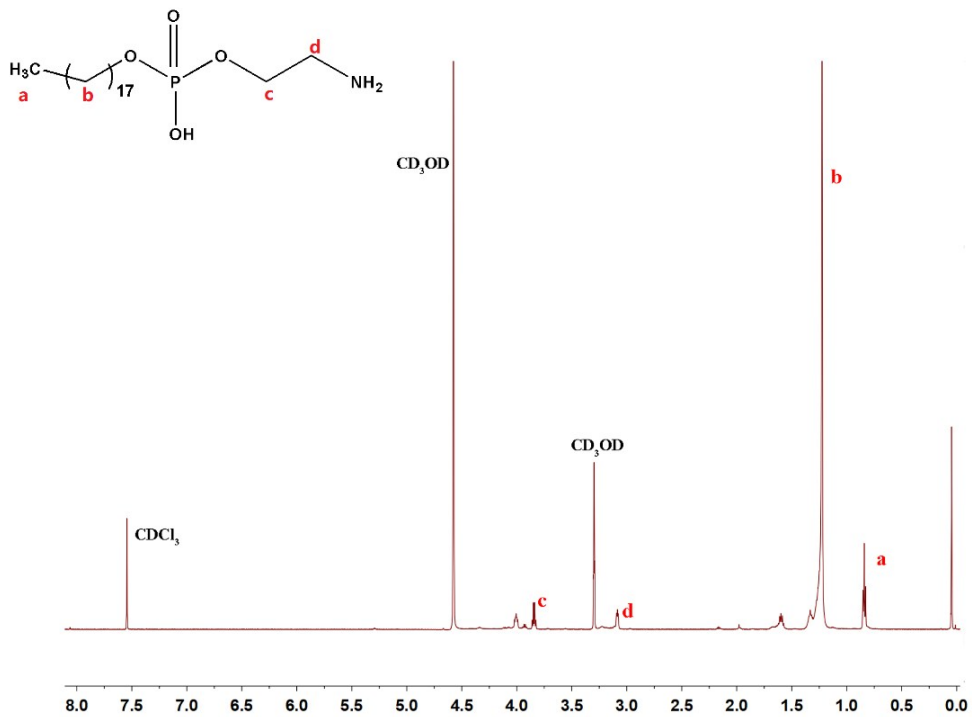

**Fig. S1 Characterization of octadecylphosphoethanolamine (OPA) by <sup>1</sup>H-NMR spectra.**

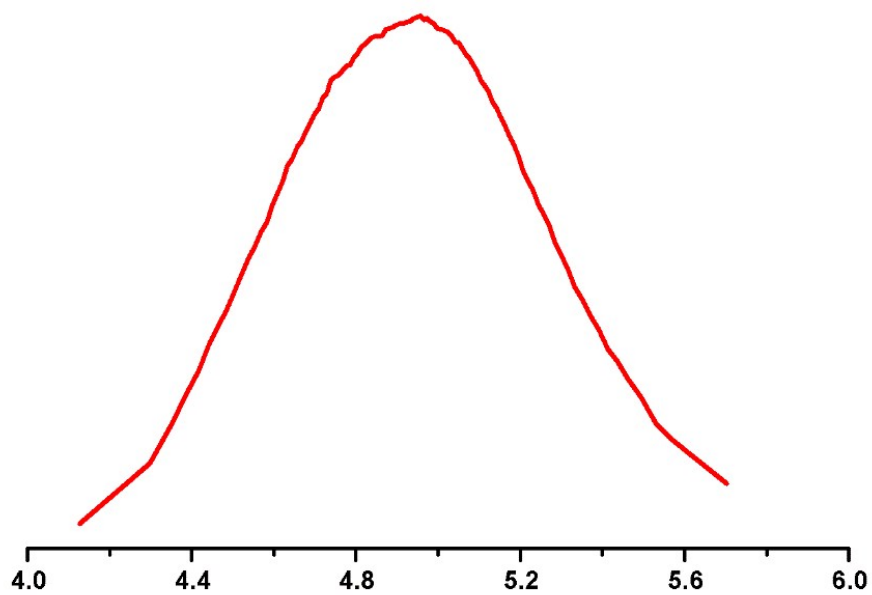

**Fig. S2 GPC spectrum of PEOP.**

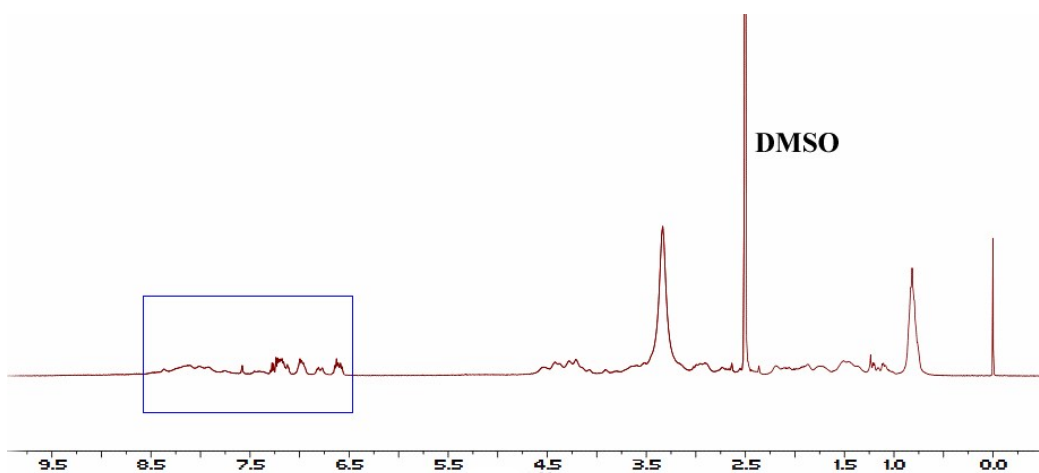

**Fig. S3**  $^1\text{H}$  NMR spectrum of Insulin.

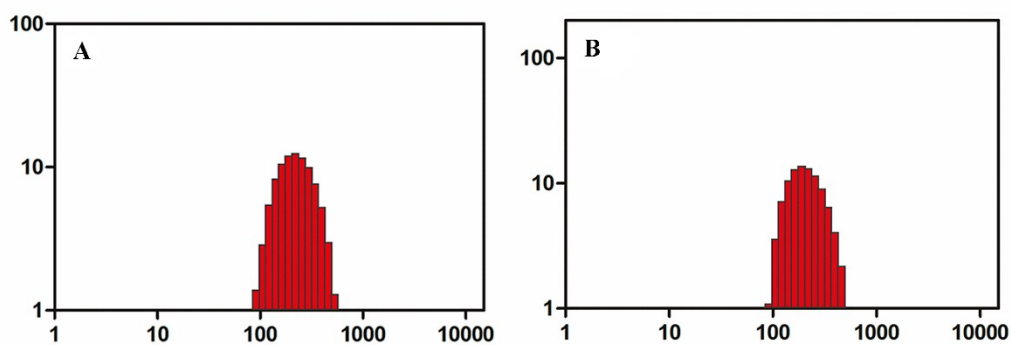

**Fig. S4** Size distribution of (A) blank PEOP vesicles, (B) insulin-PEOP vesicles.

**Table S1.** The changes of TEER of model cell monolayers.

| Sample                 | TEER ( $\Omega \cdot \text{cm}^2$ ) |             |
|------------------------|-------------------------------------|-------------|
|                        | 0 h                                 | 2 h         |
| Free FITC-INS          | $327 \pm 18$                        | $277 \pm 5$ |
| FITC-INS-PEOP vesicles | $304 \pm 5$                         | $280 \pm 7$ |
